# Supplementary material for: Maillard-conjugate based core–shell co-assemblies for nanoencapsulation of hydrophobic nutraceuticals in clear beverages
Source: Royal Society of Chemistry journal article supplement (doi:10.1039/c1fo10220f), 2011-12-23
Supplement: c1fo10220f.pdf [file c1fo10220f.pdf]

Supplementary Information for the paper:

## Maillard-conjugate based core-shell co-assemblies for nanoencapsulation of hydrophobic nutraceuticals in clear beverages

Gilad Markman<sup>a</sup> and Yoav D. Livney<sup>a\*</sup>

### Adsorption of Nile red to the glass surface when added to water: a way of probing the release of a model hydrophobic nutraceutical from nanoparticles.

Figure S1 shows the concentrations of Nile red adsorbed to glass and of Nile red in water, compared to the initially added concentration, 2 hours after addition of Nile red to water.

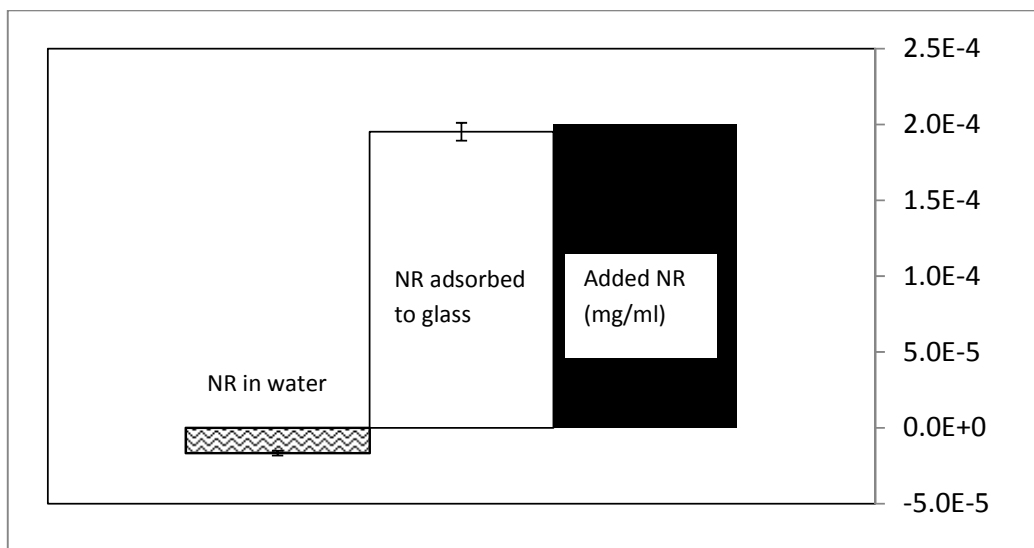

**Figure S1- detected Nile red in water and on glass, 2 hrs after addition of Nile red (1.3 $\mu$ M) to water.**

Figure S1 shows that practically all of the Nile red added to water was adsorbed to the glass. (The apparently negative Nile red concentration in water was an artifact due to subtraction of an extreme value calculated from a linear calibration curve ( $R^2=0.95$ ). The actual concentration should be zero or undetectable.)
